# Supplementary material
Source: PubMed Central journal article supplement (PMC3416398)
Supplement: AEM.00990-12_zam999103476so1.pdf [file AEM.00990-12_zam999103476so1.pdf]

## Supplemental Material

Modelling phenoxy acid herbicide mineralization and growth of microbial degraders in 15 soils monitored by quantitative real-time PCR of the functional *tfdA* gene

Jacob Bælum<sup>1,2</sup>, Emmanuel Prestat<sup>3,4</sup>, Maude M. David<sup>3</sup>, Bjarne W. Strobel<sup>5</sup>, and Carsten S. Jacobsen<sup>1,5,6\*</sup>

<sup>1</sup>Geological Survey of Denmark and Greenland (GEUS), Department of Geochemistry, Øster Voldgade 10, DK-1350 Copenhagen K, Denmark; <sup>2</sup>Technical University of Denmark, Novo Nordisk Foundation Center for Biosustainability, 2970 Hørsholm, Denmark; <sup>3</sup>Lawrence Berkeley National Laboratory, Earth Sciences Division, Berkeley, California 94720, USA; <sup>4</sup>Kansas State University, Division of Biology, Manhattan, Kansas 66506, USA; <sup>5</sup>University of Copenhagen, Department of Basic Sciences and Environment, Thorvaldsensvej 40, DK-1871 Frederiksberg C, Denmark. ; <sup>6</sup>Center for Permafrost , CENPERM, University of Copenhagen, Øster Voldgade 10, DK-1350 Copenhagen K, Denmark

Contains 2 figures.

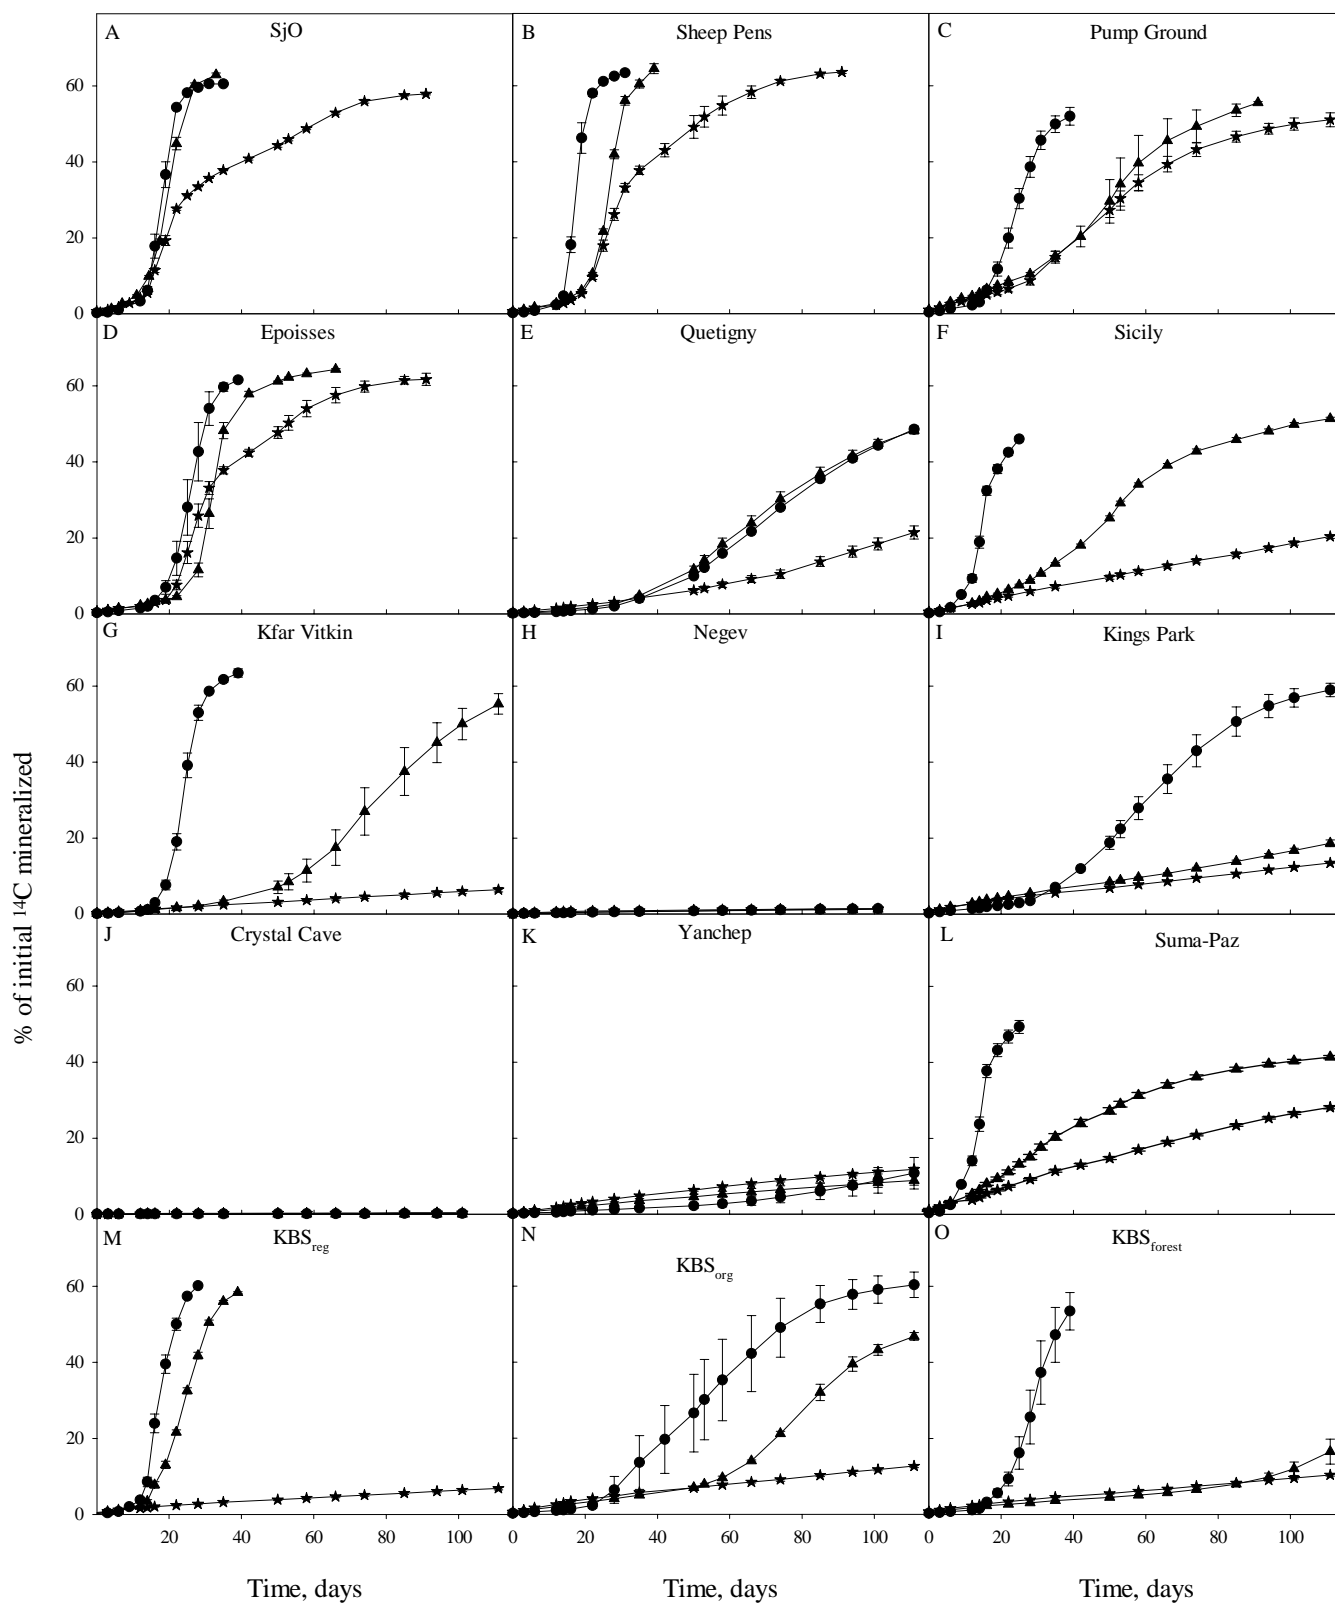

Figure S1: Mineralization curves for all of the sixteen soil scenarios. The mineralization curves of 2,4-D, MCPA, and MCPP are given for the individual soils (panel A-P). Error bars represent standard errors of the mean for soil triplicates

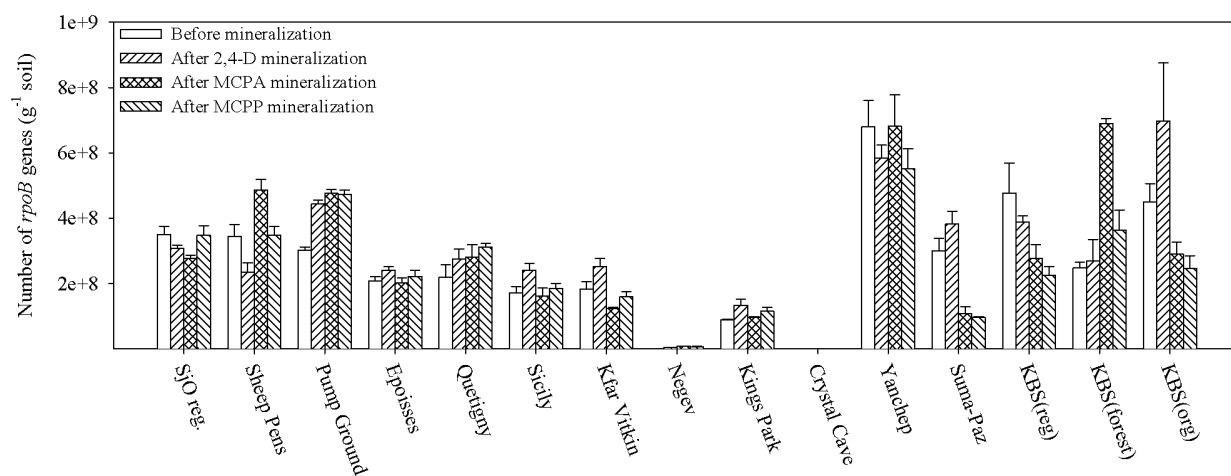

Figure S2. Quantification of *rpoB* genes. Error bars represent standard errors of the mean for soil triplicates.
